# Supplementary material
Source: PubMed Central journal article supplement (PMC4726452)

### **Appendix (Supplemental Methods)**

There has been much confusion in the literature as to how to graphically assess the performance of eGFR against mGFR. Many studies have used mGFR or  $(\text{eGFR} + \text{mGFR})/2$  on the x-axis, rather than eGFR. Both the MDRD study equation and the CKD-EPI equations were developed using least squares regression of logarithmic mGFR onto a set of predictors that sum to logarithmic eGFR. This type of regression is asymmetric and validation of eGFR must take into account the inherent asymmetry in the relationship between eGFR and mGFR. The following example shows why eGFR (not mGFR or  $(\text{eGFR} + \text{mGFR})/2$ ) should be on the x-axis during analyses of equation performance. To graphically demonstrate this principle, a new equation was developed in order to show how these principles of regression impact the development and validation of equations.

**Step 1.** A sample of 618 CKD patients with mGFR (iothalamate renal clearance) and serum creatinine values were randomly divided into a development set (n=309) and a validation set (n=309).

**Step 2.** A new eGFR equation was optimized for this population in the development set by regressing  $\ln$  mGFR onto the following parameters:  $\ln$  serum creatinine (in mg/dl),  $\ln$  age, sex, and race. For simplicity we used the same statistical model as the MDRD study equation (contains the same variables as the serum creatinine based CKD-EPI equation). The resulting equations were:

$$\begin{aligned}\ln \text{eGFR} &= 5.587 - 1.113 (\ln \text{SCr}) - 0.292 (\ln \text{age}) - 0.261 (\text{if female}) + 0.385 (\text{if black}) \\ \text{eGFR} &= 267 \times \text{SCr}^{-1.113} \times \text{Age}^{-0.292} \times 0.747 (\text{if female}) \times 1.470 (\text{if black})\end{aligned}$$

**Step 3:** Performance of this new eGFR equation was assessed in the validation cohort by plotting the % bias between eGFR and mGFR (y-axis) against mGFR (Figure A),  $(\text{eGFR} + \text{mGFR})/2$  (Figure B), and eGFR (Figure C). A trend line was added to the data on the logarithmic scale, consistent with how the equation was derived.

**Figure A. % bias across levels of mGFR**

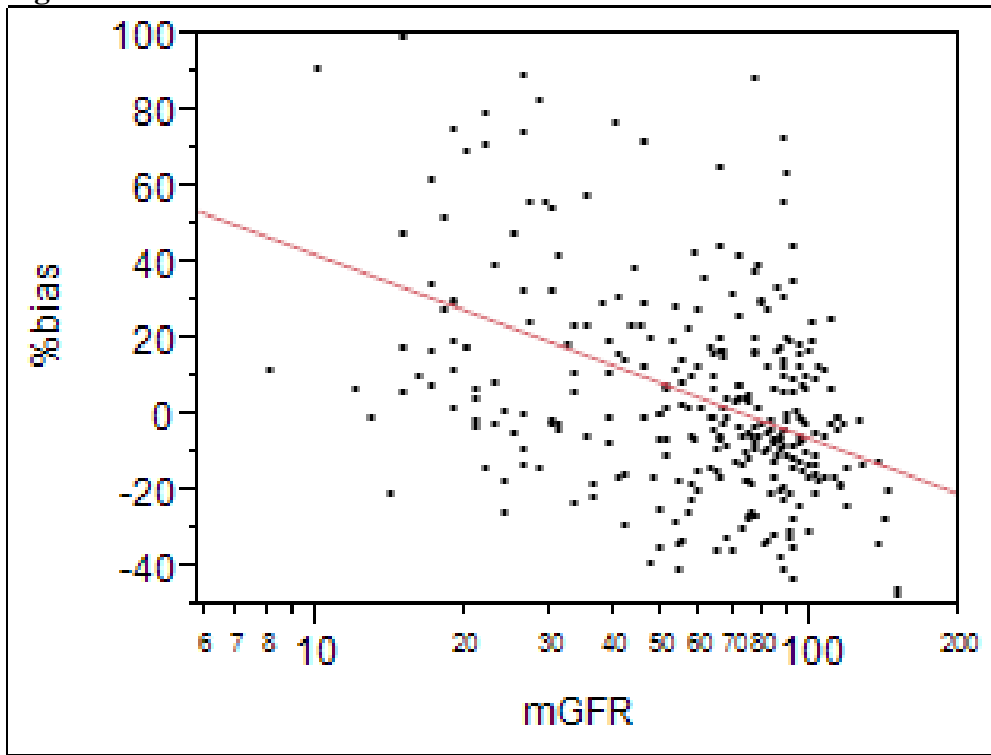

**Figure B. % bias across levels of (eGFR + mGFR)/2**

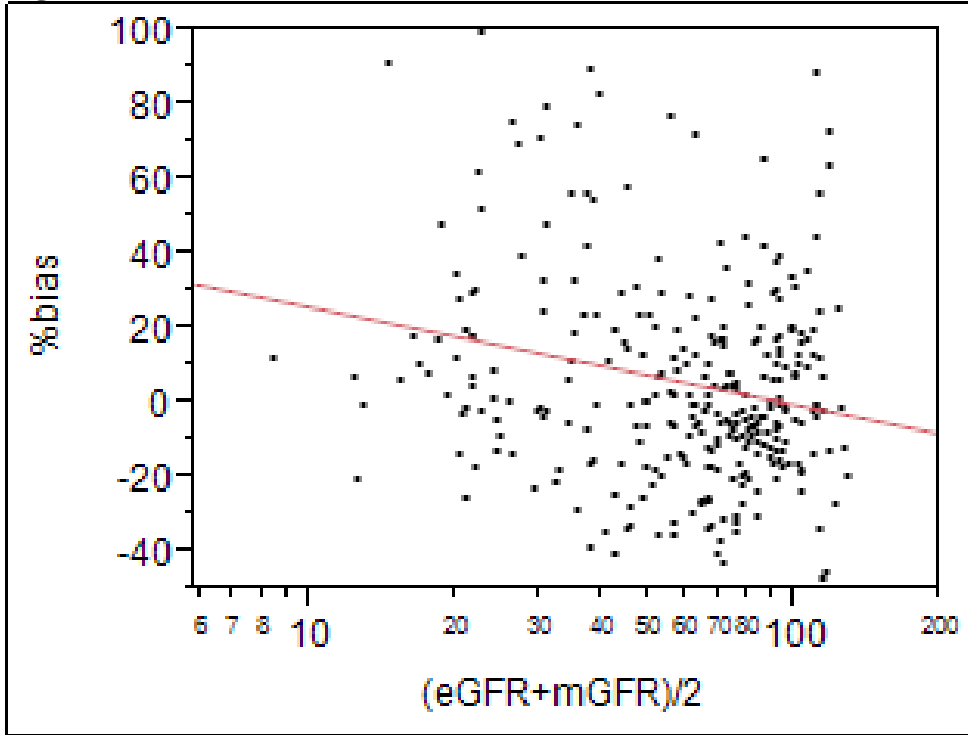

**Figure C. % bias across levels of eGFR**

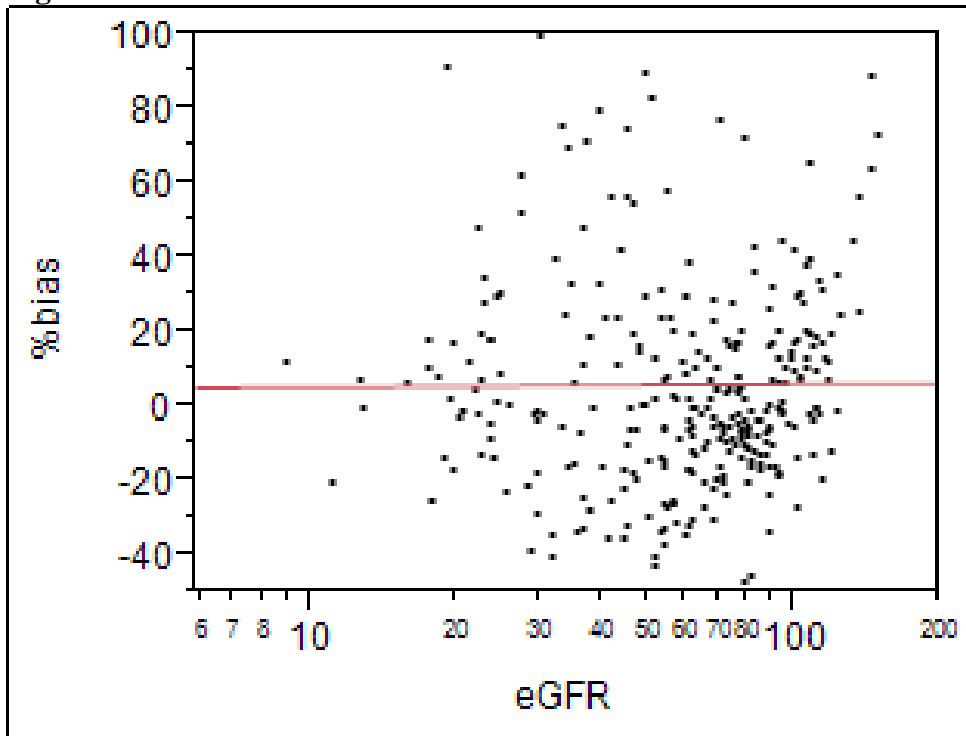

**Conclusion:** eGFR overestimates mGFR at low levels of mGFR and underestimates mGFR at high levels of mGFR (Figure A). Similar findings are evident with  $(eGFR+mGFR)/2$  on the x-axis (Figure B). This reflects the asymmetry of regression and is statistical phenomena rather than biology. The reasons for this have been previously described.<sup>1,2</sup> Briefly, with least squares regression, eGFR is derived in such a manner that  $mGFR > eGFR$  should occur equally as often as  $mGFR < eGFR$  across levels of eGFR. When mGFR is high, then  $mGFR > eGFR$  is more frequent than  $mGFR < eGFR$  leading to a perceived negative bias. When mGFR is low then  $mGFR < eGFR$  is more frequent than  $mGFR > eGFR$  leading to a perceived positive bias. However, across levels of eGFR, there is no bias (Figure C). Thus, for the analysis in this paper % bias was assessed across levels of  $\ln$  eGFR consistent with how the CKD-EPI equations were originally derived (regressing  $\ln$  mGFR onto  $\ln$  eGFR).

**References:**

1. Rule AD. Understanding estimated glomerular filtration rate: implications for identifying chronic kidney disease. *Current opinion in nephrology and hypertension*. 2007;16:242-249.
2. Hopkins WG. Bias in Bland-Altman but not Regression Validity Analyses. *Sportscience*. 2004;8:42-46.

Supplemental Table 1. eGFR % bias, Mean (95CI), for patient groups and gender.

|                                          | <b>Female</b>     | <b>Male</b>       |
|------------------------------------------|-------------------|-------------------|
| <b>Potential Donors</b>                  |                   |                   |
| eGFR <sub>Cr</sub>                       | -10 (-14, -6.3)   | -14 (-17, -10)    |
| eGFR <sub>Cys</sub>                      | 5.6 (0.7, 10)     | 3.7 (-0.8, 8.2)   |
| eGFR <sub>Cr-Cys</sub>                   | -1.3 (-5.3, 2.6)  | -4.6 (-7.9, -1.3) |
| <b>CKD Patients</b>                      |                   |                   |
| eGFR <sub>Cr</sub>                       | -1.3 (-4.5, 1.8)  | -0.5 (-3.5, 2.4)  |
| eGFR <sub>Cys</sub>                      | -0.1 (-3.2, 3.0)  | 0.3 (-2.5, 3.0)   |
| eGFR <sub>Cr-Cys</sub>                   | -2.3 (-4.8, 0.2)  | -1.6 (-4.0, 0.7)  |
| <b>Kidney Transplant Recipients</b>      |                   |                   |
| eGFR <sub>Cr</sub>                       | -0.8 (-5.3, 3.7)  | 1.5 (-1.9, 4.9)   |
| eGFR <sub>Cys</sub>                      | -5.2 (-9.7, -0.7) | -5.6 (-8.0, -3.2) |
| eGFR <sub>Cr-Cys</sub>                   | -5.4 (-9.4, -1.3) | -4.3 (-6.7, -2.0) |
| <b>Other Organ Transplant Recipients</b> |                   |                   |
| eGFR <sub>Cr</sub>                       | 3.5 (-1.6, 8.5)   | -0.3 (-5.2, 4.6)  |
| eGFR <sub>Cys</sub>                      | -8.3 (-12, -4.9)  | -7.3 (-10, -4.1)  |
| eGFR <sub>Cr-Cys</sub>                   | -5.4 (-8.5, -2.2) | -5.8 (-8.8, -2.8) |

Supplemental Table 2. Reclassification of eGFR by mGFR for clinically relevant categories.

| eGFR<br>(mL/min/1.73m <sup>2</sup> ) | eGFR <sub>Cr</sub> |       |       |        | eGFR <sub>Cys</sub> |                |                |                | eGFR <sub>Cr-Cys</sub> |               |                |                |
|--------------------------------------|--------------------|-------|-------|--------|---------------------|----------------|----------------|----------------|------------------------|---------------|----------------|----------------|
|                                      | n                  | Lower | Same  | Higher | n                   | Lower          | Same           | Higher         | n                      | Lower         | Same           | Higher         |
| <b>&gt;90</b>                        |                    |       |       |        |                     |                |                |                |                        |               |                |                |
| Potential Donors                     | 57                 | 10.5% | 89.5% | n/a    | 117                 | 21.4%          | 78.6%          | n/a            | 102                    | 13.7%         | 86.3%          | n/a            |
| Clinical CKD                         | 140                | 35.0% | 65.0% | n/a    | 145                 | 32.4%          | 67.6%          | n/a            | 133                    | 25.6%         | <b>74.4%*</b>  | n/a            |
| Kidney Recipients                    | 19                 | 57.9% | 42.1% | n/a    | 17                  | 47.1%          | 52.9%          | n/a            | 10                     | 30.0%         | <b>70.0%*</b>  | n/a            |
| Other Organ Recipients               | 29                 | 48.3% | 51.7% | n/a    | 27                  | 22.2%          | 77.8%          | n/a            | 22                     | 27.3%         | <b>72.7%*</b>  | n/a            |
| <b>60-89</b>                         |                    |       |       |        |                     |                |                |                |                        |               |                |                |
| Potential Donors                     | 79                 | 2.5%  | 35.4% | 62.0%  | 23                  | 4.3%           | <b>56.5%*</b>  | <b>39.1%*</b>  | 40                     | 7.5%          | <b>60.0%**</b> | <b>32.5%*</b>  |
| Clinical CKD                         | 176                | 11.9% | 58.0% | 30.1%  | 175                 | 9.7%           | 65.1%          | 25.1%          | 203                    | 10.3%         | 65.5%          | 24.1%          |
| Kidney Recipients                    | 149                | 24.8% | 65.8% | 9.4%   | 145                 | 23.4%          | 70.3%          | 6.2%           | 150                    | 19.3%         | 70.7%          | 10.0%          |
| Other Organ Recipients               | 88                 | 22.7% | 56.8% | 20.5%  | 84                  | 10.7%          | 77.4%          | 11.9%          | 88                     | 10.2%         | 71.6%          | 18.2%          |
| <b>45-59</b>                         |                    |       |       |        |                     |                |                |                |                        |               |                |                |
| Potential Donors                     | 11                 | 0.0%  | 18.2% | 81.8%  | 7                   | 0.0%           | 14.3%          | 85.7%          | 5                      | 0.0%          | 20.0%          | 80.0%          |
| Clinical CKD                         | 114                | 20.2% | 30.7% | 49.1%  | 100                 | 17.0%          | 38.0%          | 45.0%          | 89                     | 15.7%         | 41.6%          | 42.7%          |
| Kidney Recipients                    | 190                | 10.5% | 49.5% | 40.0%  | 171                 | 5.3%           | 51.5%          | 43.3%          | 186                    | 5.4%          | 53.8%          | 40.9%          |
| Other Organ Recipients               | 85                 | 23.5% | 37.6% | 38.8%  | 76                  | 14.5%          | 43.4%          | 42.1%          | 73                     | 9.6%          | 45.2%          | 45.2%          |
| <b>30-44</b>                         |                    |       |       |        |                     |                |                |                |                        |               |                |                |
| Potential Donors                     | 0                  | -     | -     | -      | 0                   | -              | -              | -              | 0                      | -             | -              | -              |
| Clinical CKD                         | 83                 | 18.1% | 39.8% | 42.2%  | 80                  | 13.8%          | 40.0%          | 46.3%          | 77                     | 13.0%         | 46.8%          | 40.3%          |
| Kidney Recipients                    | 159                | 11.3% | 42.1% | 46.5%  | 157                 | 4.5%           | 43.9%          | 51.6%          | 157                    | 5.7%          | 48.4%          | 45.9%          |
| Other Organ Recipients               | 90                 | 7.8%  | 42.2% | 50.0%  | 81                  | 3.7%           | 40.7%          | 55.6%          | 101                    | 5.9%          | 47.5%          | 46.5%          |
| <b>&lt;30</b>                        |                    |       |       |        |                     |                |                |                |                        |               |                |                |
| Potential Donors                     | 0                  | n/a   | -     | -      | 0                   | n/a            | -              | -              | 0                      | n/a           | -              | -              |
| Clinical CKD                         | 105                | n/a   | 81.0% | 19.0%  | 118                 | n/a            | 78.8%          | 21.2%          | 116                    | n/a           | 81.0%          | 19.0%          |
| Kidney Recipients                    | 51                 | n/a   | 74.5% | 25.5%  | 78                  | n/a            | 65.4%          | 34.6%          | 65                     | n/a           | 73.8%          | 26.2%          |
| Other Organ Recipients               | 27                 | n/a   | 66.7% | 33.3%  | 51                  | n/a            | 51.0%          | 49.0%          | 35                     | n/a           | 65.7%          | 34.3%          |
| <b>Total</b>                         |                    |       |       |        |                     |                |                |                |                        |               |                |                |
| Potential Donors                     | 147                | 5.4%  | 55.1% | 39.5%  | 147                 | <b>17.7%**</b> | <b>71.5%**</b> | <b>10.8%**</b> | 147                    | 11.6%         | <b>76.9%**</b> | <b>11.6%**</b> |
| Clinical CKD                         | 618                | 18.4% | 54.2% | 27.4%  | 618                 | 15.9%          | 58.7%          | 25.4%          | 618                    | 13.6%         | <b>62.9%*</b>  | 23.5%          |
| Kidney Recipients                    | 568                | 16.2% | 52.4% | 31.4%  | 568                 | <b>10.1%*</b>  | 55.1%          | 34.8%          | 568                    | <b>9.0%*</b>  | 58.0%          | 33.0%          |
| Other Organ Recipients               | 319                | 19.9% | 46.9% | 33.2%  | 319                 | <b>9.1%**</b>  | 55.3%          | 35.6%          | 319                    | <b>8.8%**</b> | 56.8%          | 34.4%          |

Significantly different compared to eGFR<sub>Cr</sub> \* p<0.01 \*\*p<0.001

**Supplemental Figure 1. Equation bias as a function of age.** %Bias plotted as a function of age for (A)  $eGFR_{Cr}$ , (B)  $eGFR_{Cys}$ , and (C)  $eGFR_{Cr-Cys}$ . Equation bias decreased with age among other organ transplant recipients for  $eGFR_{Cr}$  ( $P=0.02$ ) and  $eGFR_{Cr-Cys}$  ( $P=0.02$ ) but not  $eGFR_{Cys}$  ( $P=0.07$ ).

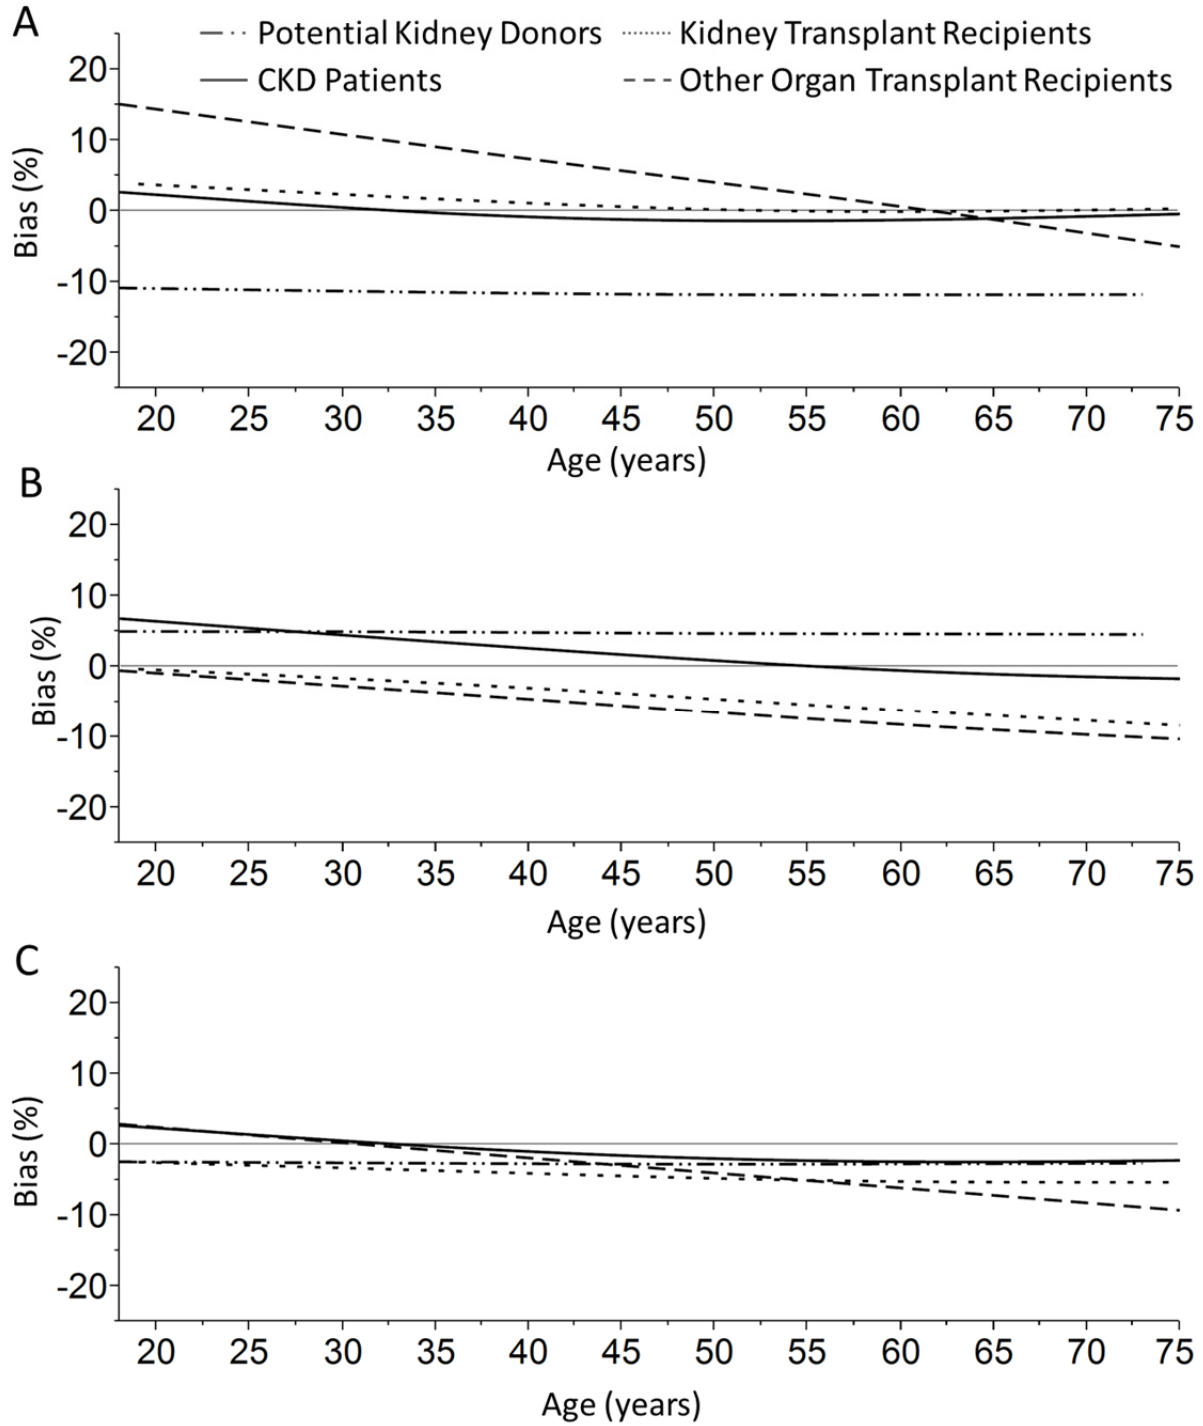

Supplement: NIHMS752333-supplement-Suppl_Methods.pdf [file NIHMS752333-supplement-Suppl_Methods.pdf]
